# Supplementary material
Source: Springer Nature journal article supplement (https://www.springermedizin.de/resource/supplementary/12969_2013_1713_MOESM1_ESM.pdf/9590724)

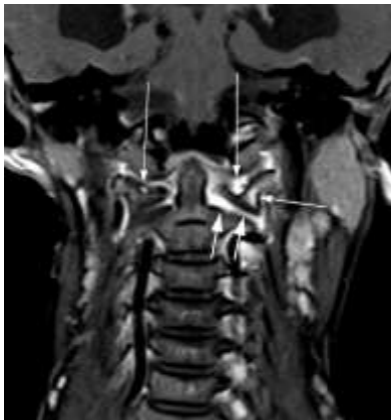

Supplement: MOESM1 [file 9590724]
